# Supplementary material
Source: PubMed Central journal article supplement (PMC7802175)
Supplement: 13062_2021_291_MOESM4_ESM.pdf [file 13062_2021_291_MOESM4_ESM.pdf]

|              |    |         |        |        |       |       |       |       |        |         |       |       |     |      |       |      |       |     |    |    |
|--------------|----|---------|--------|--------|-------|-------|-------|-------|--------|---------|-------|-------|-----|------|-------|------|-------|-----|----|----|
| 5F15/25-396  | 25 | SAATGWV | VLFVAV | LVVWFV | SLDMR | HLVGP | DTEGR | YAEIS | REMFAS | - - - - | GDWV  | TI    | RY  | NAL  | - - - | KYFE | K - - | PP  | 87 |    |
| 5EZM/25-396  | 25 | SAATGWV | VLFVAV | LVVWFV | SLDMR | HLVGP | DTEGR | YAEIS | REMFAS | - - - - | GDWV  | TI    | RY  | NAL  | - - - | KYFE | K - - | PP  | 87 |    |
| TMTC1/23-456 | 23 | -GLAPA  | GAAALL | GASCLC | YGRSL | QGEFV | HDDV  | WAIVN | NP     | DVRPG   | APLRW | GIFT  | ND  | FWGK | GMA   | ENT  | SHK   | S   | YR | 94 |
| TMTC2/1-474  | 1  | - - - - | MI     | AELV   | SSAL  | G     | LALY  | LNTLS | AD     | FCY     | DD    | SRAIK | TNQ | DL   | PET   | PW   | -     | TH  | I  | 67 |
| TMTC3/4-428  | 4  | - - -   | INLKE  | ITLIV  | GVVT  | AC    | YWN   | SLFC  | G      | FV      | DD    | VSA   | ILD | NKD  | LH    | PS   | T     | PL  | -  | 72 |
| TMTC4/17-464 | 17 | LPPFW   | AKLVV  | GSVA   | IVCFA | RSYD  | GDFV  | - -   | FDD    | SEA     | IVN   | NKD   | LQA | ET   | PL    | -    | GD    | LWH | H  | 86 |

|              |    |       |     |       |      |     |     |     |       |     |     |       |       |     |         |         |         |         |         |         |     |
|--------------|----|-------|-----|-------|------|-----|-----|-----|-------|-----|-----|-------|-------|-----|---------|---------|---------|---------|---------|---------|-----|
| 5F15/25-396  | 88 | FHMWV | -TV | VGYEL | FLGL | G-E | -WQ | ARL | AVALS | GLL | GIG | VSMMA | ARRWF | -GA | - - - - | - - - - | - - - - | RAA     | AFT     | GL      | 144 |
| 5EZM/25-396  | 88 | FHMWV | -TV | VGYEL | FLGL | G-E | -WQ | ARL | AVALS | GLL | GIG | VSMMA | ARRWF | -GA | - - - - | - - - - | - - - - | RAA     | AFT     | GL      | 144 |
| TMTC1/23-456 | 95 | LCVLT | -FK | LNIF  | L    | TGM | -NP | FYF | HAVN  | I   | LH  | CLV   | TL    | VMY | T       | CD      | KTV     | FK      | -NR     | - - - - | 153 |
| TMTC2/1-474  | 68 | LCTLS | -F  | RLN   | HAI  | GGL | -NP | WSY | HLV   | NV  | LL  | HAAV  | TGL   | FTS | FS      | KILL    | -GDG    | - - - - | - - - - | YWT     | 125 |
| TMTC3/4-428  | 73 | LTVLT | -F  | R     | LN   | YL  | SEL | -K  | PMS   | YHL | N   | MIF   | HAVV  | S   | VIF     | L       | KV      | CL      | F       | LDN     | 129 |
| TMTC4/17-464 | 87 | LTVLT | -F  | R     | IN   | YY  | LS  | GG  | FHP   | V   | G   | FHV   | VN    | I   | L       | L       | HS      | G       | I       | S       | 158 |

|              |     |       |      |     |      |     |      |     |       |     |     |     |     |         |    |     |     |     |      |     |     |
|--------------|-----|-------|------|-----|------|-----|------|-----|-------|-----|-----|-----|-----|---------|----|-----|-----|-----|------|-----|-----|
| 5F15/25-396  | 145 | APMWS | VAAH | - - | FNT  | LDM | TLAG | VMS | CVLAF | M   | LMG | QHP | DAS | - - - - | VA | ARR | GWM | VAC | WAAM | GVA | 208 |
| 5EZM/25-396  | 145 | APMWS | VAAH | - - | FNT  | LDM | TLAG | VMS | CVLAF | M   | LMG | QHP | DAS | - - - - | VA | ARR | GWM | VAC | WAAM | GVA | 208 |
| TMTC1/23-456 | 154 | HP    | I    | HTE | AVAG | I   | VR   | AD  | V     | LAC | L   | L   | F   | L       | A  | F   | L   | S   | YN   | R   | 223 |
| TMTC2/1-474  | 126 | HP    | I    | HTE | AVAG | I   | VR   | AD  | V     | LAC | L   | L   | F   | L       | A  | F   | L   | S   | YN   | R   | 190 |
| TMTC3/4-428  | 130 | HP    | I    | HTE | AVT  | G   | V    | GRA | EL    | SS  | I   | F   | FLA | A       | F  | L   | S   | Y   | T    | R   | 192 |
| TMTC4/17-464 | 159 | HP    | V    | HTE | CVAG | V   | V    | GR  | AD    | L   | L   | C   | A   | L       | F  | L   | S   | F   | L    | G   | 225 |

|              |     |    |   |   |   |   |   |   |   |   |   |   |   |   |   |         |         |         |         |   |     |
|--------------|-----|----|---|---|---|---|---|---|---|---|---|---|---|---|---|---------|---------|---------|---------|---|-----|
| 5F15/25-396  | 209 | AL | P | G | L | V | L | V | Y | T | L | V | T | R | D | - - - - | - - - - | - - - - | - - - - | W | 256 |
| 5EZM/25-396  | 209 | AL | P | G | L | V | L | V | Y | T | L | V | T | R | D | - - - - | - - - - | - - - - | - - - - | W | 256 |
| TMTC1/23-456 | 224 | T  | V | F | G | V | C | L | V | Y | D | L | F | S | L | SN      | KQ      | D       | K       | S | 288 |
| TMTC2/1-474  | 191 | T  | V | L | A | V | S | A | V | D | V | F | V | F | H | R       | L       | K       | I       | K | 251 |
| TMTC3/4-428  | 193 | T  | V | V | G | I | C | C | V | Y | E | V | F | I | A | Q       | G       | Y       | T       | L | 262 |
| TMTC4/17-464 | 226 | T  | V | L | G | L | N | A | V | F | D | I | L | V | I | G       | K       | F       | N       | V | 296 |

|              |     |   |         |         |         |         |         |         |         |         |         |         |         |         |         |         |         |         |         |         |     |
|--------------|-----|---|---------|---------|---------|---------|---------|---------|---------|---------|---------|---------|---------|---------|---------|---------|---------|---------|---------|---------|-----|
| 5F15/25-396  | 257 | E | - - - - | - - - - | - - - - | - - - - | - - - - | - - - - | - - - - | - - - - | - - - - | - - - - | - - - - | - - - - | - - - - | - - - - | - - - - | - - - - | - - - - | - - - - | 295 |
| 5EZM/25-396  | 257 | E | - - - - | - - - - | - - - - | - - - - | - - - - | - - - - | - - - - | - - - - | - - - - | - - - - | - - - - | - - - - | - - - - | - - - - | - - - - | - - - - | - - - - | - - - - | 291 |
| TMTC1/23-456 | 289 | L | F       | S       | E       | Q       | DN      | P       | A       | S       | F       | S       | P       | Y       | I       | L       | T       | R       | F       | L       | 361 |
| TMTC2/1-474  | 252 | S | F       | S       | N       | S       | DN      | P       | A       | A       | D       | S       | D       | S       | L       | L       | T       | R       | T       | L       | 324 |
| TMTC3/4-428  | 263 | V | F       | T       | R       | F       | DN      | P       | A       | A       | V       | S       | P       | -       | T       | P       | T       | R       | Q       | L       | 334 |
| TMTC4/17-464 | 297 | A | F       | T       | E       | V       | DN      | P       | A       | S       | F       | A       | D       | S       | M       | L       | V       | R       | A       | V       | 369 |

|              |     |   |   |   |   |   |   |   |   |   |   |   |   |   |   |   |   |   |   |   |     |     |
|--------------|-----|---|---|---|---|---|---|---|---|---|---|---|---|---|---|---|---|---|---|---|-----|-----|
| 5F15/25-396  | 296 | I | F | P | K | L | W | T | A | M | R | A | P | R | F | R | P | A | L | M | A   | 358 |
| 5EZM/25-396  | 292 | I | F | P | K | L | W | T | A | M | R | A | - | R | F | R | P | A | L | M | A   | 353 |
| TMTC1/23-456 | 362 | L | H | C | L | A | A | F | K | - | R | L | - | B | H | K | E | V | L | G | 427 |     |
| TMTC2/1-474  | 325 | Y | Y | G | L | K | S | P | - | S | V | D | - | R | E | I | V | V | L | S | 390 |     |
| TMTC3/4-428  | 335 | V | F | S | I | R | Y | S | - | G | - | S | S | K | T | V | L | M | A | L | 399 |     |
| TMTC4/17-464 | 370 | C | Q | A | L | C | S | E | D | - | G | H | - | K | R | R | I | L | T | L | 435 |     |

|              |     |   |   |   |   |   |   |   |   |   |   |   |   |   |   |   |   |   |   |   |     |
|--------------|-----|---|---|---|---|---|---|---|---|---|---|---|---|---|---|---|---|---|---|---|-----|
| 5F15/25-396  | 359 | S | W | G | - | K | Q | L | I | G | M | A | I | V | A | A | C | G | L | L | 387 |
| 5EZM/25-396  | 354 | S | W | G | - | K | Q | L | I | G | M | A | I | V | A | A | C | G | L | L | 382 |
| TMTC1/23-456 | 428 | L | N | R | - | C | G | A | T | T | L | I | V | S | T | V | L | L | L | L | 456 |
| TMTC2/1-474  | 391 | V | Q | K | - | R | F | L | K | S | L | I | F | Y | A | T | A | T | L | I | 419 |
| TMTC3/4-428  | 400 | S | V | F | - | K | K | L | S | W | I | C | L | S | M | V | I | L | T | H | 428 |
| TMTC4/17-464 | 436 | T | K | K | - | K | L | I | A | A | V | V | L | G | I | L | F | I | N | T | 464 |
